1 Intestinal cell kinase regulates chondrocyte proliferation and maturation during skeletal  
2 development

3

4 Mengmeng Ding<sup>1</sup>, Li Jin<sup>1</sup>, Lin Xie<sup>1</sup>, So Hyun Park<sup>2</sup>, Yixin Tong<sup>2,3</sup>, Di Wu<sup>2</sup>, Zheng Fu<sup>2\*</sup>,  
5 Xudong Li<sup>1\*</sup>

6 <sup>1</sup>Department of Orthopaedic Surgery, University of Virginia, Charlottesville, VA 22908, USA

7 <sup>2</sup>Department of Pharmacology, University of Virginia, Charlottesville, Virginia 22908, USA

8 <sup>3</sup>The Gastrointestinal Surgery Center, Tongji Hospital, Huazhong University of Science &  
9 Technology, Hubei, 430030, China

10

11 \*Corresponding authors:

12 Xudong Li, Department of Orthopaedic Surgery, University of Virginia, 135 Hospital Dr.

13 Charlottesville, VA 22908; Tel: 434-982-4135; Fax: 434-924-1691; Email address:

14 [xl2n@virginia.edu](mailto:xl2n@virginia.edu)

15

16 Zheng Fu, Department of Pharmacology, University of Virginia, PO Box 800735, 1340 Jefferson

17 Park Avenue, Charlottesville, Virginia 22908; Telephone: 434-982-3204; Fax: 434-982-3878;

18 Email address: [zf6n@virginia.edu](mailto:zf6n@virginia.edu)

19 **Authors' contributions:** Drs. Jin, Li, and Fu conceived the project and wrote the article. Jin,  
20 Ding, Fu, Xie, Tong, Park, Wu performed the experiments and analyses. All authors have read  
21 and approved the final submitted manuscript.

22

23 **Abstract**

24 An autosomal recessive loss-of-function mutation R272Q in human *ICK* (intestinal cell kinase)  
25 gene causes profound multiplex developmental defects in human ECO (endocrine-cerebro-  
26 osteodysplasia) syndrome. ECO patients exhibit a wide variety of skeletal abnormalities, yet the  
27 underlying cellular and molecular mechanisms by which *ICK* regulates skeletal development  
28 remain largely unknown. The goal of this study is to understand the structural and mechanistic  
29 basis underlying skeletal anomalies caused by *ICK* dysfunction. *Ick* R272Q knock in transgenic  
30 mouse model not only recapitulated major ECO skeletal defects such as short limbs and  
31 polydactyly but also revealed a deformed spine with deficient intervertebral disc. Loss of *ICK*  
32 functions markedly reduces mineralization in the spinal column, ribs, and long bones. *Ick*  
33 mutants show a significant decrease in the number of proliferating chondrocytes and type X  
34 collagen-expressing hypertrophic chondrocytes in the spinal column and the growth plate of long  
35 bones. Our results demonstrate that *ICK* plays an important role in bone and intervertebral disc  
36 development by promoting chondrocyte proliferation and maturation, and thus provide novel  
37 mechanistic insights into the skeletal phenotypes of human ECO syndrome.

38

39 Keywords: intestinal cell kinase; endocrine-cerebro-osteodysplasia; intervertebral disc;  
40 chondrocyte proliferation; hypertrophic chondrocyte

41

42

43

44

45

46

47

## 48 **Introduction**

49           Endochondral ossification is a stringently controlled and coordinated process during axial  
50 bone development, starting from mesenchymal stem cell condensation to form a template of  
51 future bone. Chondrocytes at the end of the template proliferate, while chondrocytes in the  
52 middle of the template differentiate into hypertrophic chondrocytes that secrete extracellular  
53 matrix (ECM). Hypertrophic chondrocytes eventually undergo apoptosis, and leave the  
54 cartilaginous matrix scaffold that attracts osteoblasts to form the primary spongiosa [1-2].

55           Primary cilium, a microtubule-based organelle, has been implicated an important role in  
56 the skeletal development and homeostasis [3]. Mutations interfering with formation and  
57 maintenance of primary cilia were identified in skeletal ciliopathies, including Ellis-van Creveld  
58 syndrome (EVC), cranioectodermal dysplasia (CED), asphyxiating thoracic dystrophy (ATD),  
59 short rib-polydactyly syndrome (SRPS), and endocrine-cerebro-osteodysplasia (ECO) syndrome  
60 [4]. ICK, a highly conserved and ubiquitously expressed serine/threonine protein kinase in  
61 human kinome, plays an important role in the maintenance of primary cilium. Several loss-of-  
62 function point mutations in human *ICK* gene, including c.1305G-A (R272Q), c.358G-T  
63 (G120C), and c.238G-A (E80K), were reported in ECO and ECO-like syndromes that display  
64 profound skeletal abnormalities such as polydactyly, short ribs, bowed limbs, and abnormal long  
65 bones [5-9].

66           Our prior work has demonstrated an important role for ICK in the regulation of cell  
67 proliferation and survival *in vitro* [10-11]. An essential role of ICK *in vivo* emerged from the  
68 report of human ECO and ECO-like syndromes [5-7]. Recently, *Ick* knockout mouse models  
69 reproduced ECO phenotypes in the cerebral and skeletal systems and linked ICK deficiency to

70 abnormal structures of primary cilia [7-9]. However, cellular and molecular mechanisms of ICK  
71 in skeletal phenotypes are still elusive. In order to advance our understanding of the structural  
72 and mechanistic basis underlying skeletal anomalies caused by ICK dysfunction, we generated  
73 an *Ick* R272Q knock-in mouse model that can recapitulate ECO developmental phenotypes  
74 including skeletal defects. We analyzed the fetal bones of *Ick* R272Q mutant embryos with  
75 respect to skeletal phenotype, chondrocyte proliferation and differentiation. Our results  
76 demonstrate that ICK plays a critical role in the development of axial skeleton and intervertebral  
77 disc (IVD) by regulating chondrocyte proliferation and maturation.

78

## 79 **Materials and Methods**

### 80 **Generation of *Ick*<sup>R272Q</sup> knock-in mutant mice**

81 All procedures involving animals were performed in accordance with ethical standards in  
82 an animal protocol that was approved by the Institutional Animal Care and Use Committee. The  
83 R272Q (CGA>CAA) point mutation was introduced into the exon 8 of the wild-type (WT) *Ick*  
84 allele on a bacterial artificial chromosome (BAC) to generate *Ick*/R272Q BAC. A LNL (LoxP-  
85 Neo-LoxP) cassette was inserted in the intron downstream of exon 8. A gene targeting vector  
86 was constructed by retrieving the 5kb long homology arm (5' to LNL), the LNL cassette, and the  
87 2kb short homology arm (3' to LNL) into a plasmid vector carrying the DTA (diphtheria toxin  
88 alpha chain) negative selection marker. The LNL cassette conferred G418 resistance during gene  
89 targeting in PTL1 (129B6 hybrid) ES cells and the DTA cassette provided an autonomous  
90 negative selection to reduce the random integration event during gene targeting. Several targeted  
91 ES cell clones were identified and injected into C57BL/6 blastocysts to generate chimeric mice.

92 Male chimeras were bred to homozygous EIIa (*cre/cre*) females (in C57BL/6J background) to  
93 excise the neo cassette and to transmit the *Ick/R272Q* allele through germline (Precision  
94 Targeting Lab, USA). *Ick<sup>R272Q</sup>* heterozygous were normal and inter-crossed to produce *Ick<sup>R272Q</sup>*  
95 homozygous embryos. Animals were housed in a temperature controlled colony room on a 12-  
96 hour light cycle, and had access to food and water ad libitum. For timed pregnancy, the presence  
97 of a copulation plug in the morning represented embryonic day (E) 0.5. Pregnant mice were  
98 euthanized by CO<sub>2</sub> inhalation and embryos were harvested at different developmental time points  
99 (n=2-5).

100

### 101 **Whole-mount skeletal staining**

102 Embryos at E15.5 or E18.5 were placed in PBS after euthanization. The skin, internal  
103 organs and bubbles were removed from the body cavity, and then fixed in 95% Ethanol. The  
104 cartilage was stained with Alcian Blue and bone was stained with Alizarin Red following a  
105 standard protocol [12]. After clearing, samples were placed in 100% glycerol for long-term  
106 storage and photography (Olympus SZX12, Olympus).

### 107 **Alcian blue and Picrosirius red staining**

108 Embryos were washed with PBS and fixed in 100% ethanol overnight. Paraffin  
109 embedded sections (5µm) were subjected to 1% Alcian blue solution (pH 2.5) and Picrosirius red  
110 (0.1% Sirius red in saturated aqueous picric acid) staining. Images were taken with a Nikon  
111 Eclipse E600 microscope. Five semi-serial sections (10 µm between each level) through the  
112 center of femurs and spine from each mouse were cut, stained, and photographed for  
113 measurement using an NIS element BR imaging software (Nikon, Japan).

### 114 **Von kossa staining**

115 Paraffin embedded sections were dewaxed and incubated in 5% silver nitrate solution  
116 (w/v, Sigma, MO) under UV light for 30 minutes. Sections were rinsed in distilled water and  
117 immersed in 5% sodium thiosulfate (Sigma, MO) for 5 mins and counterstained with  
118 hematoxylin (Sigma) for 5 mins.

### 119 **Immunohistochemistry**

120 Immunostaining for paraffin sections was performed as described previously [13-14]. For  
121 collagen X (GTX105788, 1:400, GeneTex, CA) and collagen II (CB11,1:100, Chondrex, WA)  
122 staining, sections were treated with 2% bovine testicular hyaluronidase 30 minutes for antigen  
123 retrieval. For phospho-H3 (H0412,1:200, Sigma, MO) staining, sections were immersed in 10  
124  $\mu$ M of sodium citrate solution at 85°C for 30 minutes for antigen retrieval. The standard 3,3'-  
125 diaminobenzidine (DAB) procedure was followed to visualize the signal. Hematoxylin was used  
126 for counter-staining. IgG control was performed following identical procedures excluding the  
127 primary antibody.

### 128 **Micro-computed tomography (micro-CT)**

129 Embryos at 18.5 were fixed in 10% formalin. Micro-CT scans were performed on a  
130 micro-CT 80 scanner (70 kV, 114  $\mu$ A; Scanco Medical, Switzerland), and then were  
131 reconstructed with an isotropic voxel size of 10  $\mu$ m. Multi-level thresholds procedure (threshold  
132 for bone = 225) was applied to discriminate soft tissue from bone. Three-dimensional images  
133 were acquired for qualitative evaluation in an X-ray image mode.

134

### 135 **Statistical analysis**

136           Histological quantification data were expressed as mean  $\pm$  SD. Statistical comparison  
137 between genotypes was performed by a two-tailed student's *t*-test.  $p < 0.05$  was considered  
138 significant.

## 139 **Results**

### 140 **Overall morphological defects in *Ick*<sup>R272Q</sup> homozygous mutant embryos**

141           Previously we have shown that ICK is ubiquitously expressed in mouse tissues [15]. We  
142 first examined ICK expression in bone and cartilage tissues by Western blotting and by  $\beta$ -  
143 galactosidase staining of an *Ick-LacZ* reporter mouse. As shown in supplementary Fig.1A, ICK  
144 protein was detected in tibia, sternum, and rib at a level that is comparable to that of lung and  
145 heart. A truncated *Ick* transcript fused with *LacZ* was expressed in *Ick*<sup>tmla/+</sup> heterozygotes (from  
146 NIH Knockout Mouse Project Repository) [9], thus LacZ staining can be used to map ICK  
147 expression in mouse tissues. In supplementary Fig.1B, LacZ staining of E15.5 whole embryos  
148 clearly indicates ICK expression in limbs and spine.

149           Consistent with *Ick* R272Q being an autosomal recessive mutation in ECO syndrome,  
150 *Ick*<sup>R272Q/+</sup> heterozygous mice were phenotypically indistinguishable from WT littermates.  
151 *Ick*<sup>R272Q/+</sup> heterozygotes were interbred to generate *Ick*<sup>R272Q/R272Q</sup> homozygotes that succumbed to  
152 death shortly after birth. Embryos from *Ick*<sup>R272Q/+</sup> interbreed were harvested at E15.5 and E18.5.  
153 Gross morphology of *Ick*<sup>R272Q/R272Q</sup> mutants is remarkably distinct from that of WT or  
154 heterozygous mutant littermates. *Ick* R272Q homozygous mutants have a broader head, smaller  
155 nose, bigger mouth, and shorter thorax. They also display broader cervical flexure, shorter  
156 distance between lower jaw to the forelimb, and larger abdominal cavity, flat ankles, and flat  
157 neck-spine angles (Fig. 1). These features closely resemble the clinical manifestations of ECO

158 syndrome [9]. In addition to reported ECO skeletal phenotypes, these mutant mice also exhibit  
159 severe defects in the spinal column (Fig. 1b).

### 160 **Skeletal defects in *Ick*<sup>R272Q</sup> homozygous mutant**

161 To further investigate the role of ICK in bone and cartilage, whole mount skeletal  
162 analysis was performed on *Ick* mutant embryos. The skeletal phenotypes of *Ick*<sup>R272Q/R272Q</sup> include  
163 short limbs, polydactyly, bowed long bones and much less bone mineralization (Fig. 2A). At  
164 E15.5, limb and tarsal bones of *Ick* mutants are all deviated; longitudinal length of long bones is  
165 significantly reduced, and polydactyly is evident in both forelimb and hindlimb (average 6.5  
166 digits) as compared with WT littermates. A striking new discovery made in our *Ick* mutant  
167 mouse model that was not previously reported is the dramatic deformation of the spine.  
168 Compared with WT, the vertebrae and transverse processes of *Ick* mutants are severely deficient  
169 as shown by whole mount skeletal staining and micro-CT at E18.5 (Fig. 2B). Impaired  
170 mineralization of rib cage may not support the initial breath after birth.

### 171 **Abnormal phenotype of growth plate and intervertebral disc**

172 Histological analyses were performed on femurs and spines of E15.5 and E18.5 embryos.  
173 *Ick* mutant femur is much shorter. While the size of cartilage region of *Ick* mutant femur is not  
174 significantly different from that of WT femur, endochondral bone is barely detectable at E15.5  
175 femurs and at least two fold less at E18.5 femurs in *Ick* mutants as compared with controls,  
176 resulting in severely shortened bone (Fig. 3). The relative length of proliferating chondrocyte  
177 (PC) zone normalized to PC and resting chondrocyte (RC) zone is significantly shorter in *Ick*  
178 mutant than in WT littermates (Fig. 3). Von Kossa staining confirms much less matrix  
179 mineralization in *Ick* mutant femurs at E15.5 and E18.5 (Fig. 5).



180 In *Ick* mutant embryos, the vertebrae appears deformed and the IVD is defective (Fig. 4).  
181 Compared with WT, vertebrae of *Ick* mutants is much narrower, irregularly shaped, and severely  
182 distorted. A significant reduction of mineralization in the spinal column of *Ick* mutants is shown  
183 by Von Kossa staining (Fig. 5).

#### 184 **Abnormal chondrocytes maturation in *Ick* mutant skeletal system**

185 Hypertrophic chondrocytes play an important role in bone mineralization. To determine  
186 whether impaired mineralization of *Ick* mutant embryos is due to compromised chondrocyte  
187 maturation, we performed immunostaining to compare the expression of collagen type II, a  
188 marker for chondrocytes. In E15.5 WT embryos, type II collagen is primarily expressed in the  
189 resting and proliferative chondrocytes and ECM in the growth plate of femurs (Fig. 6). It is also  
190 expressed in the pre-hypertrophic zone. In contrast, *Ick* mutant embryos express type II collagen  
191 throughout the proliferative region and into the hypertrophic region.

192 In WT spine, collagen type II expresses abundantly in annulus fibrosus (AF) tissue and  
193 proliferating chondrocytes (Fig. 6). In *Ick* mutants, IVDs are deficient, and collagen II expression  
194 was observed in proliferating and hypertrophic zones (Fig. 6). Type X collagen was observed in  
195 the hypertrophic regions and ECM of long bones and vertebrae in WT E15.5, but much less in  
196 *Ick* mutants. These results indicate that lack of ICK functions significantly impairs chondrocyte  
197 maturation in both spine and long bones.

#### 198 **Reduced chondrocytes proliferation in *Ick* mutant skeletal system**

199 Growth within the cartilage is dependent upon the proliferation of chondrocytes. To  
200 examine proliferation in *Ick* mutant embryos, we performed phospho-H3 staining of sections of  
201 the spine and long bones from *Ick* WT and mutant embryos. As shown in Figure 7, a marked

202 reduction in the percentage of pH3 positive nuclei (brown color) in the growth plate of long  
203 bones and spines of *Ick* mutant embryos was observed as compared with WT. This data suggests  
204 that ICK is required to maintain high rate of chondrocyte proliferation in rapidly growing long  
205 bones and spinal columns during mouse skeletal development.

## 206 **Discussion**

207 ECO is a rare recessive genetic disorders caused by a homozygous loss-of-function  
208 mutation R272Q in the human *ICK* gene. Recent studies from *Ick* knockout mouse models  
209 confirmed ECO phenotypes in the skeletal system; however, the cellular and molecular  
210 mechanisms underlying the skeletal defects in ECO syndrome are still elusive. Using an  
211 innovative ECO mutation knock-in mouse model, we hereby demonstrate that ICK functional  
212 deficiency not only reduces chondrocyte proliferation but also disrupts chondrocyte  
213 differentiation and maturation, resulting in severe deficiency in mineralization of long bones and  
214 spinal column.

215

216 *Ick*<sup>R272Q/R272Q</sup> mutant revealed a marked disruption of growth plate architecture with a  
217 reduction in proliferative chondrocyte zone, consistent with what was observed earlier in *Ick*<sup>-/-</sup>  
218 mutant [7,9]. Here, we provide further evidence that a significant decrease in proliferating  
219 chondrocytes leads to the shortened PC zone of growth plate. Although the hypertrophic  
220 chondrocyte zone of *Ick*<sup>R272Q/R272Q</sup> is not significantly different from that of WT, the number of  
221 hypertrophic chondrocytes expressing collagen X, a marker for terminally differentiated  
222 hypertrophic chondrocytes, is dramatically reduced concomitant with a severe deficiency in  
223 calcified cartilage matrix and a significant delay of mineralization in the long bone and spinal  
224 ossification center. In the final step of chondrocyte differentiation, the cartilaginous matrix is

225 replaced by mineralized matrix [16]. Hypertrophic chondrocyte terminal differentiation is a  
226 critical step in mineralization. This developmental process requires stringent control mechanisms  
227 including action of hormones, morphogens, ECM proteins as well as transcriptional factors [17-  
228 18]. There are common factors that regulate both chondrocyte maturation and bone calcification  
229 [19]. *Ick* mutant embryos show a higher expression of collagen II in hypertrophic zone  
230 concomitant with a much lower type X collagen expression in the ossification center. These  
231 results provide new evidence for an essential role of ICK in chondrogenic cell differentiation and  
232 maturation during skeletal development.

233

234 A striking new skeletal phenotype of ECO syndrome identified in *Ick* R272Q mutant is  
235 the deficiency of IVD. IVD consists of gelatinous nucleus pulposus (NP) in the center,  
236 surrounded by fibrocartilaginous annulus fibrosus (AF), and superior and inferior cartilaginous  
237 endplates. NP is believed to be derived from the notochord while AF and endplate are developed  
238 from sclerotome [20]. Notochord formation is the foundation of the disc development because  
239 notochord is a crucial signaling center for the paraxial mesoderm that gives rise to the sclerotome  
240 and subsequently fibrous AF tissue and cartilage endplate of IVD [21-22]. NP is apparent by  
241 E15.5 as shown in Fig. 4, composed of notochordal cells and large vacuolated cells. Disruption  
242 of notochord formation and/or sclerotome specification can lead to a much smaller or completely  
243 absence of IVD. Thus, the absence of IVD in *Ick* mutant spine strongly implicates an essential  
244 role for ICK in the determination of early notochord and sclerotome formation which requires  
245 further investigation in our future studies.

246

247 In summary, we demonstrate that *Ick* R272Q knock-in mouse model resembles the  
248 clinical features of ECO, and ICK plays an important role in bone and IVD development by  
249 regulating chondrocyte proliferation, differentiation and maturation.

250  
251 **Acknowledgments:** We are grateful to financial support partially from NIH R01AR064792 (XL),  
252 DK082614 and CA195273 (ZF). We appreciate the technical assistance of the Research Histology  
253 Core at University of Virginia. The funders have no role in the study.

## 254 **References**

- 255 1. Kronenberg HM. Developmental regulation of the growth plate. 2003. *Nature* 423:332–336.
- 256 2. Olsen BR, Reginato AM, Wang W. 2000. Bone development. *Annu Rev Cell Dev Biol*  
257 16:191–220.
- 258 3. Serra R. Role of intraflagellar transport and primary cilia in skeletal development. 2008. *Anat*  
259 *Rec (Hoboken)* 291:1049-61.
- 260 4. Badano JL, Mitsuma N, Beales PL, Katsanis N. 2006. The ciliopathies: An emerging class of  
261 human genetic disorders. *Annu. Rev. Genomics Hum. Genet.* 7:125–148.
- 262 5. Lahiry P, Wang J, Robinson JF, Turowec JP, Litchfield DW, Lanktree MB, Gloor GB,  
263 Puffenberger EG, Strauss KA, Martens MB, et al. 2009. A multiplex human syndrome  
264 implicates a key role for intestinal cell kinase in development of central nervous, skeletal,  
265 and endocrine systems. *Am. J. Hum. Genet.* 84:134–147.
- 266 6. Oud MM, Bonnard C, Mans DA, Altunoglu U, Tohari S, Ng AY, Eskin A, Lee H, Rupar CA,  
267 de Wagenaar NP, et al. 2016. A novel ICK mutation causes ciliary disruption and lethal  
268 endocrine-cerebro-osteodysplasia syndrome. *Cilia*, 2016;5, doi: 10.1186/s13630-016-0029-1.
- 269 7. Paige TS, Kunova BM, Varecha M, Balek L, Barta T, Trantirek L, Jelinkova I, Duran I,  
270 Vesela I, Forlenza KN, Martin JH, Hampl A, Bamshad M, Nickerson D, Jaworski ML, Song

- 271 J, Ko HW, Cohn DH, Krakow D, Krejci P. 2016. An inactivating mutation in intestinal cell  
272 kinase, ICK, impairs hedgehog signalling and causes short rib-polydactyly syndrome. *Hum*  
273 *Mol Genet.* 25:3998-4011.
- 274 8. Chaya T, Omori Y, Kuwahara R, Furukawa T. 2014. ICK is essential for cell type-specific  
275 ciliogenesis and the regulation of ciliary transport. *EMBO J* 33:1227-1242
- 276 9. Moon H, Song J, Shin JO, Lee H, Kim HK, Eggenschwiller JT, Bok J, Ko HW. 2014.  
277 Intestinal cell kinase, a protein associated with endocrine-cerebro-osteodysplasia syndrome,  
278 is a key regulator of cilia length and Hedgehog signaling. *Proc Natl Acad Sci U S A*  
279 111:8541-8546
- 280 10. Fu Z, Kim J, Vidrich A, Sturgill TW, Cohn, SM.2009. Intestinal cell kinase, a MAP kinase-  
281 related kinase, regulates proliferation and G1 cell cycle progression of intestinal epithelial  
282 cells. *Am J Physiol Gastrointest Liver Physiol* 297:G632-640
- 283 11. Bolick DT, Chen T, LA OA, Tong Y, Wu D, Joyner LT 2nd, Oria RB, Guerrant RL, Fu Z.  
284 2014. Intestinal cell kinase is a novel participant in intestinal cell signaling responses to  
285 protein malnutrition. *PLoS One* 9:e106902
- 286 12. Rigueur D, Lyons KM. 2014. Whole-mount skeletal staining. *Mehods Mol Biol.* 1130:113-  
287 21. doi: 10.1007/978-1-62703-989-5\_9.
- 288 13. Xiao L, Ding M, Zhang Y, Chordia M, Pan D, Shimer A, Shen FH, Glover D, Jin L, Li X.  
289 2017. A novel modality for functional imaging in acute intervertebral disc herniation via  
290 tracking leukocyte infiltration. *Molecular Imaging and Biology.* [Epub ahead of print]
- 291 14. Jin L, Liu Q, Scott P, Zhang D, Shen FH, Balian G, Li X. 2014. Annulus fibrosus cell  
292 characteristics are a potential source of intervertebral disc pathogenesis. *PLoS One*  
293 9(5):e96519.

- 294 15. Chen T, Wu D, Moskaluk CA, Fu Z. 2013. Distinct expression patterns of ICK/MAK/MOK  
295 protein kinases in the intestine implicate functional diversity. PLoS One 8:e79359.
- 296 16. Karsenty G, Wagner EF. 2002. Reaching a Genetic and Molecular Understanding of Skeletal  
297 Development. Developmental Cell 2:389-406.
- 298 17. Horton WA. 2003. Skeletal development: insights from targeting the mouse genome. Lancet  
299 362:560-569.
- 300 18. Breur GJ, Farnum CE, Padgett GA, Wilsman NJ. 1992. Cellular basis of decreased rate of  
301 longitudinal growth of bone in pseudoachondroplastic dogs. J Bone Joint Surg Am 74:516-  
302 28.
- 303 19. Michigami T. Regulatory mechanisms for the development of growth plate cartilage.2013.  
304 Cell Mol Life Sci. 70:4213-21.
- 305 20. Sivakamasundari V, Lufkin T. 2012. Bridging the gap: understanding embryonic  
306 intervertebral disc development. Cell Dev Biol 1:103.
- 307 21. Yamanaka Y, Tamplin OJ, Beckers A, Gossler A, Rossant J. 2007. Live imaging and genetic  
308 analysis of mouse notochord formation reveals regional morphogenetic mechanisms. Dev  
309 Cell 13:884–896.
- 310 22. McCann MR, Tamplin OJ, Rossant J, Séguin CA. 2012. Tracing notochord-derived cells  
311 using a Noto-cre mouse: implications for intervertebral disc development. Dis Model Mech  
312 5:73–82.

313

314

## 315 **Figure Legends**

316 **Figure 1:** Gross morphological abnormalities of *Ick* R272Q homozygous mutant. **(A)** Sagittal  
317 views of *Ick* mutant (R272Q) and wild type (WT) littermate at E15.5. **(B)** Alcian blue staining

318 showing distorted spine in *Ick* mutant at E15.5 as compared with WT littermate. (C).

319 Quantification data indicating significantly increased abdominal length, decreased neck length,

320 head circumference, and neck-spine angle in *Ick* mutant embryos (n=3).

321 **Figure 2:** Skeletal defects of *Ick* R272Q homozygous mutant. (A) Whole mount skeletal staining

322 of E15.5 embryos of *Ick* mutant and WT using Alizarin Red S (calcified tissue in red) and Alcian

323 blue (cartilage tissue in blue). Note, *Ick* R272Q embryos show polydactyly, reduced

324 mineralization (red), as well as bowed long bones. (B) Micro-CT images showing severe

325 deficiency in vertebrae and spinal process of E18.5 *Ick* R272Q embryo.

326 **Figure 3:** Bone ossification is significantly reduced in *Ick* R272Q mutant embryos. Paraffin

327 embedded femoral sections were stained with Alcian blue and nuclear fast red. At E15.5,

328 hypertrophic chondrocytes locate in the ossification center of *Ick* mutant embryos, whereas

329 mineralized bone form in the WT littermates. At E18.5, bone ossification was observed in *Ick*

330 mutant embryos but much less than in WT littermate embryos. *Ick* mutants show a much shorter

331 femur and endochondral bone that display a significantly decreased proliferative zone (n=4).

332 **Figure 4:** *Ick* mutant spine is distorted and deficient of intervertebral discs. In *Ick* mutant spine,

333 only premature chondrocytes (E15.5) or hypertrophic chondrocytes (E18.5) locate in the spinal

334 ossification center. The width of spinal column is much narrower in *Ick* mutants as compared

335 with their WT littermates (n=3). Scale bar=100  $\mu$ m.

336 **Figure 5:** Mineralization of spinal column and femur is severely impaired in *Ick* mutant

337 embryos. Paraffin embedded sections from E15.5 and E18.5 embryos stained by von Kossa

338 showing mineralized bone in black. In E18.5 embryos, significantly less mineralization of femur

339 and spine was observed in *Ick* mutant than in WT embryos (n=3).

340 **Figure 6:** Loss of ICK functions significantly alters chondrocyte differentiation and maturation  
341 in spinal column and femur. Paraffin embedded sections from spinal columns and femurs of  
342 E15.5 WT and R272Q mutants were immunostained for collagen II or collagen X. Note that in  
343 the spinal and femur ossification centers of *Ick* mutant embryos, most of the cells were collagen  
344 II-positive chondrocytes and collagen X-positive terminally differentiated chondrocytes were  
345 barely detectable (spine) or markedly reduced (femur).

346 **Figure 7:** ICK dysfunction attenuates chondrocyte proliferation in spinal column and femur.  
347 Paraffin embedded sections from E15.5 of WT and *Ick* mutant embryos were immunostained  
348 with the proliferation marker p-Histone H3. Bar graphs show the quantitative data of positive  
349 cells (n=3). Scale bar=50  $\mu$ m.

350  
351 **Supplemental Figure 1:** ICK expression is detected in the bone and cartilage tissue. **(A)**  
352 Western blot showing ICK expression in tibia, sternum, and rib. **(B)** LacZ staining showing ICK  
353 expression in the spine and limbs. Scale bar=200  $\mu$ m

354 Supplemental Method: *In-situ* Lac-Z staining

355 The heterozygous *Ick-LacZ* knockout/reporter mice (strain ID: *Ick<sup>tm1a(KOMP)Mbp</sup>*) were obtained from the  
356 Knockout Mouse Project (KOMP) Repository. Whole embryos were fixed in 4% paraformaldehyde  
357 (PFA) solution for two hours, followed by rinses in PBS containing 0.01% sodium deoxycholate and  
358 0.02% NP-40 before incubation with X-gal (1 mg/ml) solution at RT until color developed to desired  
359 intensity.



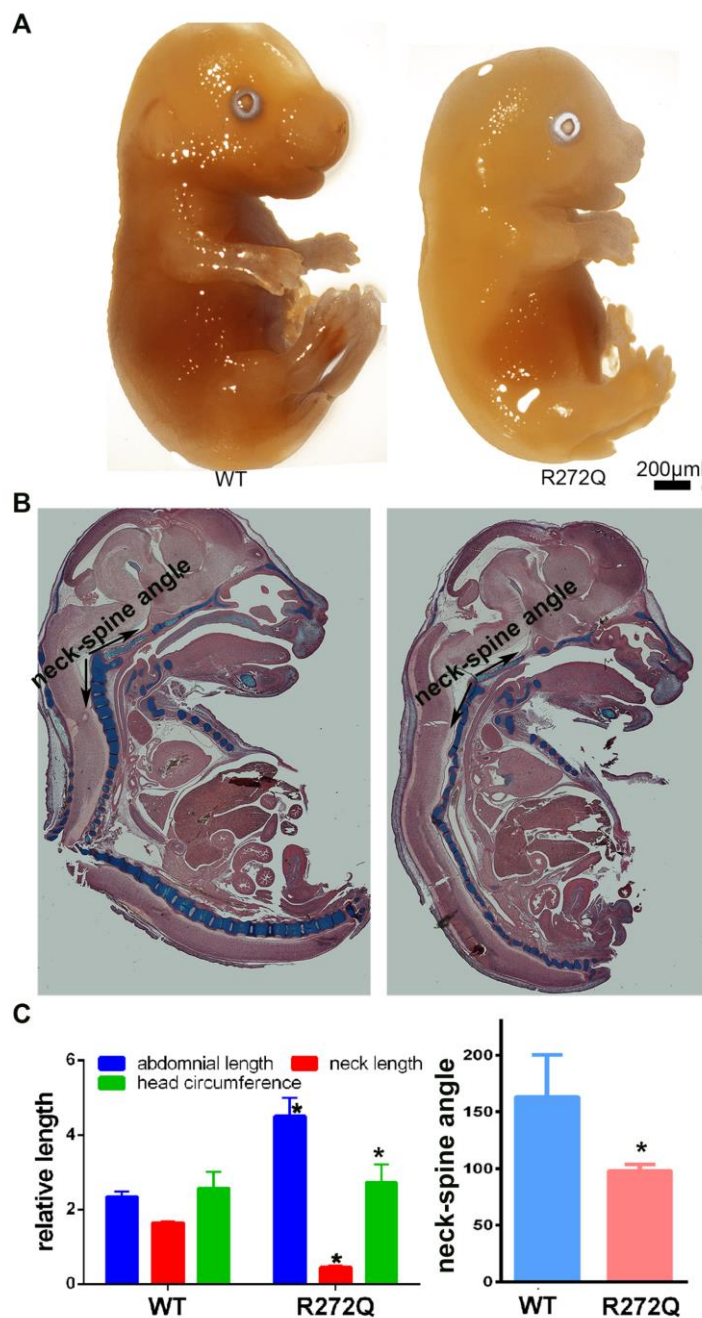

360

361 **Figure 1:** Gross morphological abnormalities of *Ick* R272Q homozygous mutant. (A) Sagittal  
362 views of *Ick* mutant (R272Q) and wild type (WT) littermate at E15.5. (B) Alcian blue staining  
363 showing distorted spine in *Ick* mutant at E15.5 as compared with WT littermate. (C).  
364 Quantification data indicating significantly increased abdominal length, decreased neck length,  
365 head circumference, and neck-spine angle in *Ick* mutant embryos (n=3).

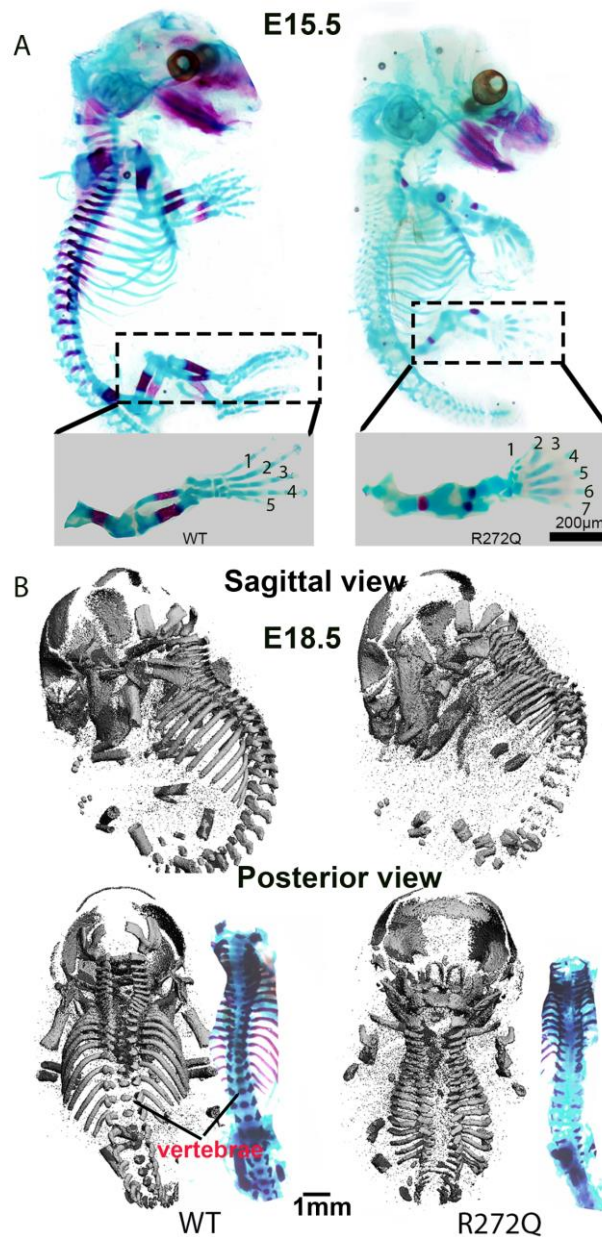

366

367 **Figure 2:** Skeletal defects of *Ick* R272Q homozygous mutant. (A) Whole mount skeletal staining  
368 of E15.5 embryos of *Ick* mutant and WT using Alizarin Red S (calcified tissue in red) and Alcian  
369 blue (cartilage tissue in blue). Note, *Ick* R272Q embryos show polydactyly, reduced  
370 mineralization (red), as well as bowed long bones. (B) Micro-CT images showing severe  
371 deficiency in vertebrae and spinal process of E18.5 *Ick* R272Q embryo.

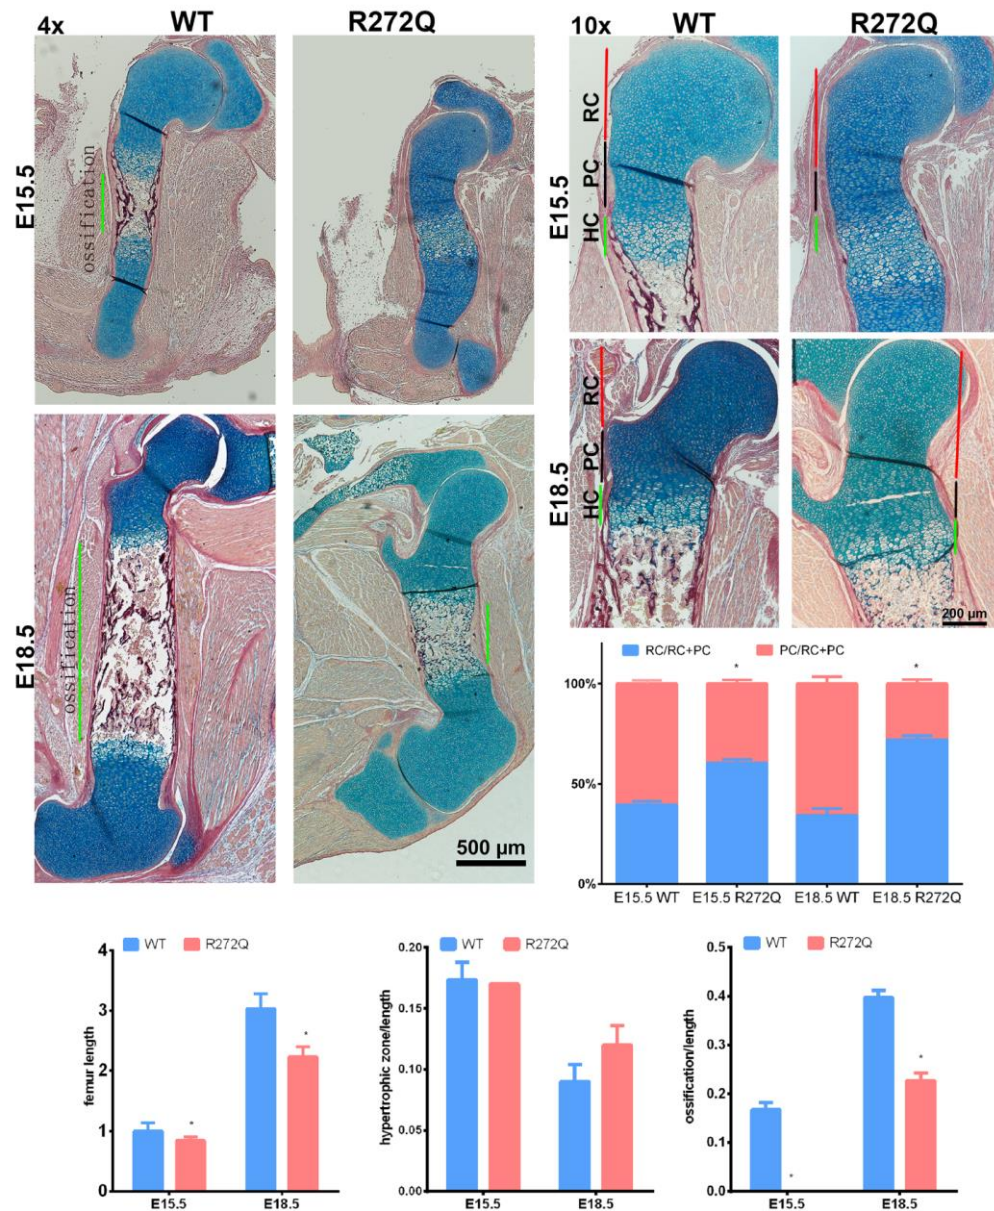

372

373 **Figure 3:** Bone ossification is significantly reduced in *Ick* R272Q mutant embryos. Paraffin  
 374 embedded femoral sections were stained with Alcian blue and nuclear fast red. At E15.5,  
 375 hypertrophic chondrocytes locate in the ossification center of *Ick* mutant embryos, whereas  
 376 mineralized bone form in the WT littermates. At E18.5, bone ossification was observed in *Ick*  
 377 mutant embryos but much less than in WT littermate embryos. *Ick* mutants show a much shorter  
 378 femur and endochondral bone that display a significantly decreased proliferative zone (n=4).

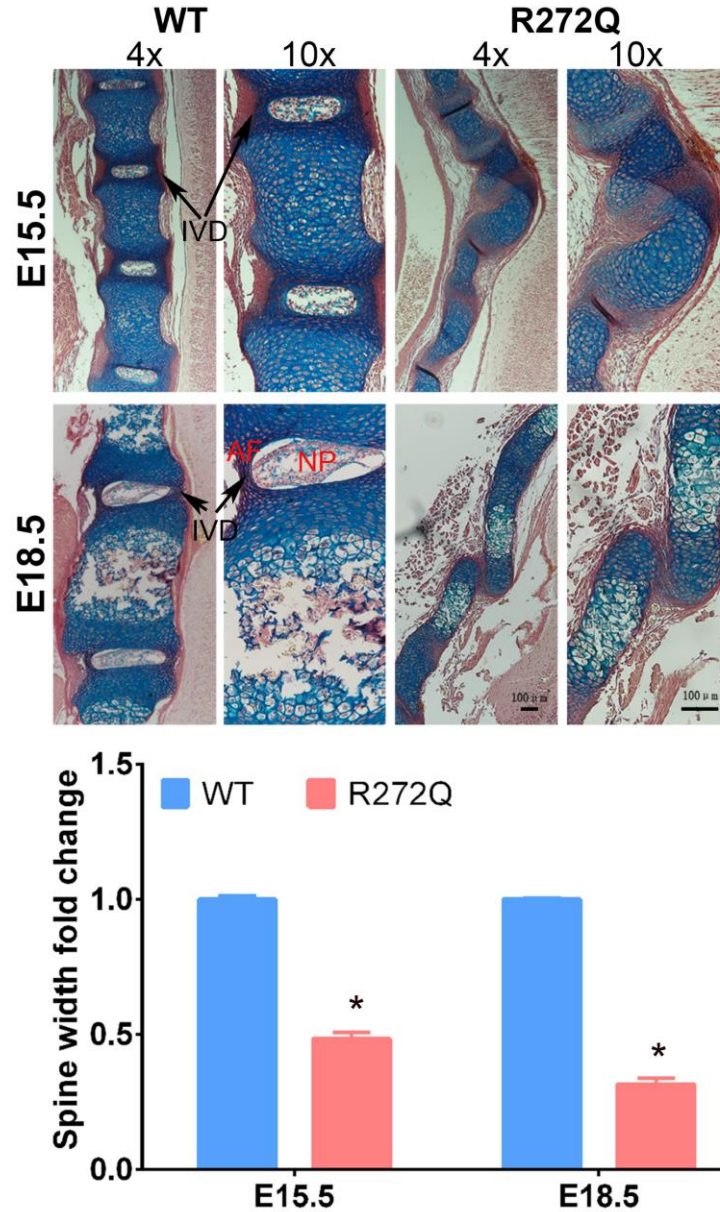

379

380 **Figure 4:** *Ick* mutant spine is distorted and deficient of intervertebral discs. In *Ick* mutant spine,  
381 only premature chondrocytes (E15.5) or hypertrophic chondrocytes (E18.5) locate in the spinal  
382 ossification center. The width of spinal column is much narrower in *Ick* mutants as compared  
383 with their WT littermates (n=3). Scale bar=100  $\mu$ m.

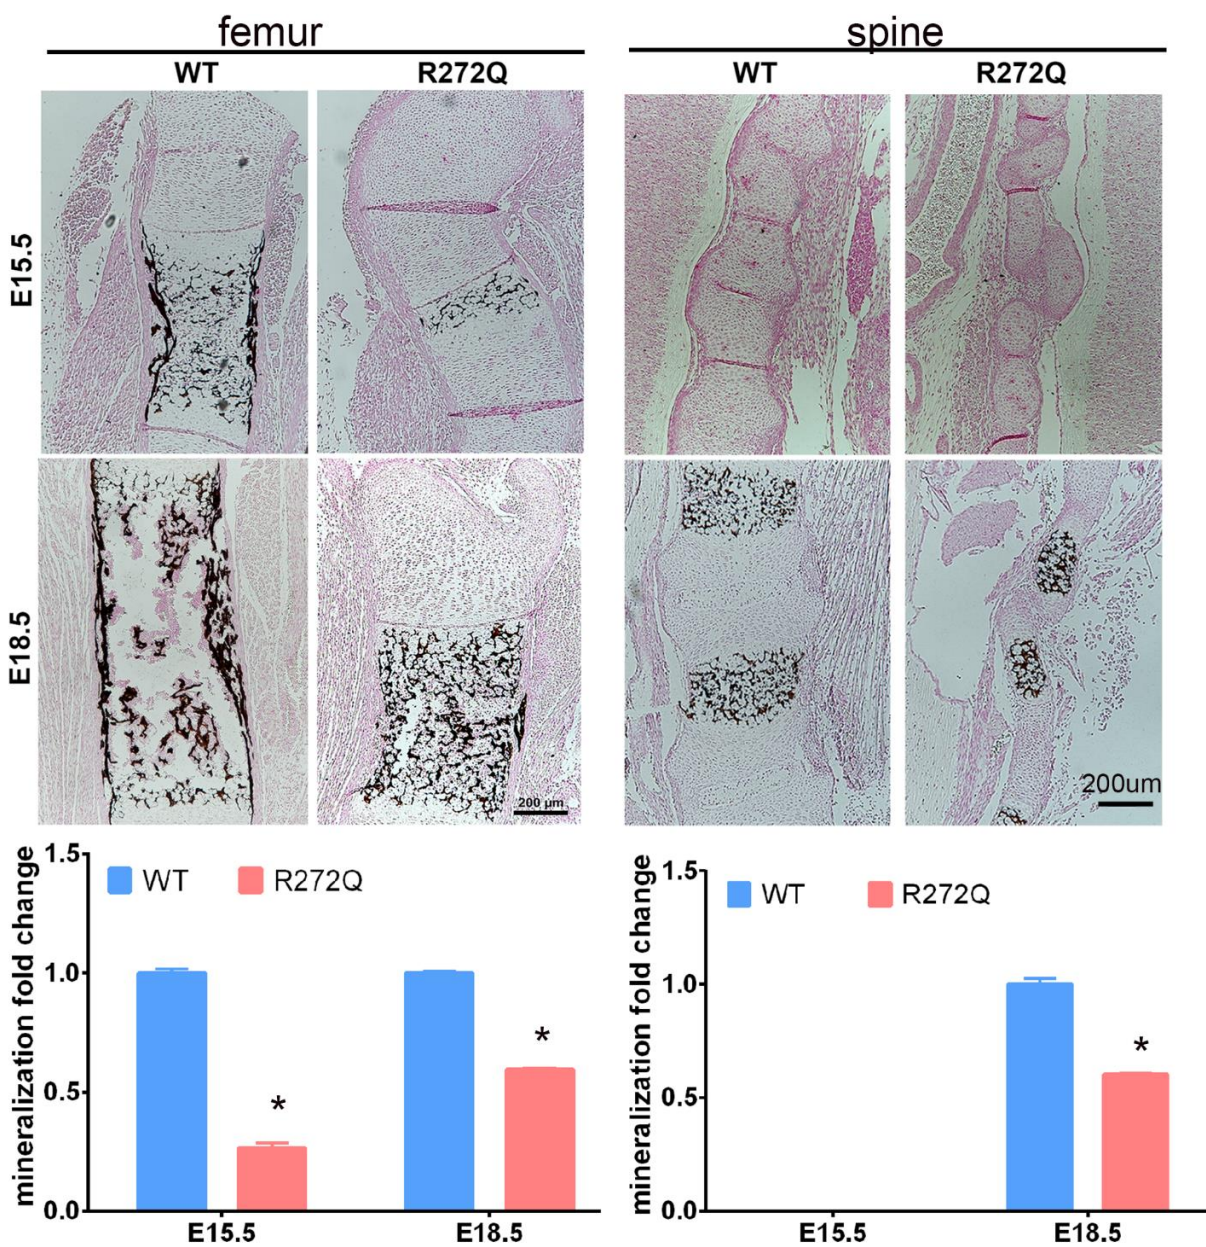

384

385 **Figure 5:** Mineralization of spinal column and femur is severely impaired in *Ick* mutant  
386 embryos. Paraffin embedded sections from E15.5 and E18.5 embryos stained by von Kossa  
387 showing mineralized bone in black. In E18.5 embryos, significantly less mineralization of femur  
388 and spine was observed in *Ick* mutant than in WT embryos (n=3).

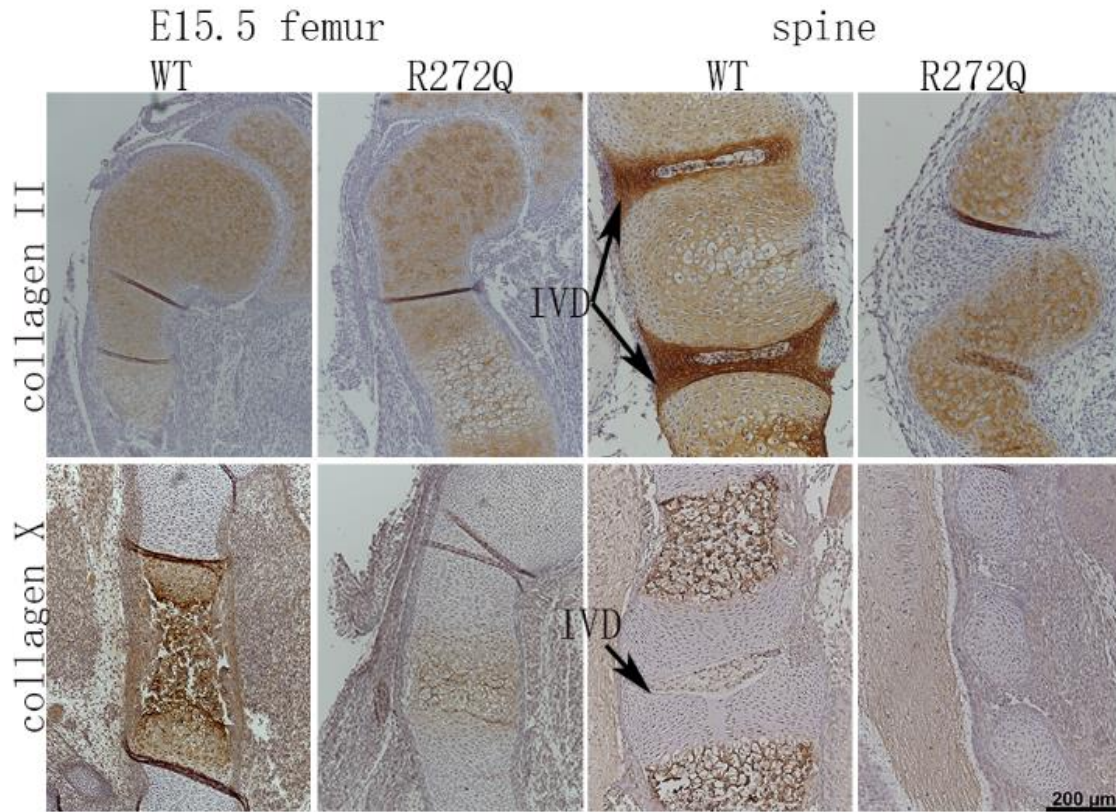

389

390 **Figure 6:** Loss of ICK functions significantly alters chondrocyte differentiation and maturation  
391 in spinal column and femur. Paraffin embedded sections from spinal columns and femurs of  
392 E15.5 WT and R272Q mutants were immunostained for collagen II or collagen X. Note that in  
393 the spinal and femur ossification centers of *Ick* mutant embryos, most of the cells were collagen  
394 II-positive chondrocytes and collagen X-positive terminally differentiated chondrocytes were  
395 barely detectable (spine) or markedly reduced (femur).

396

397

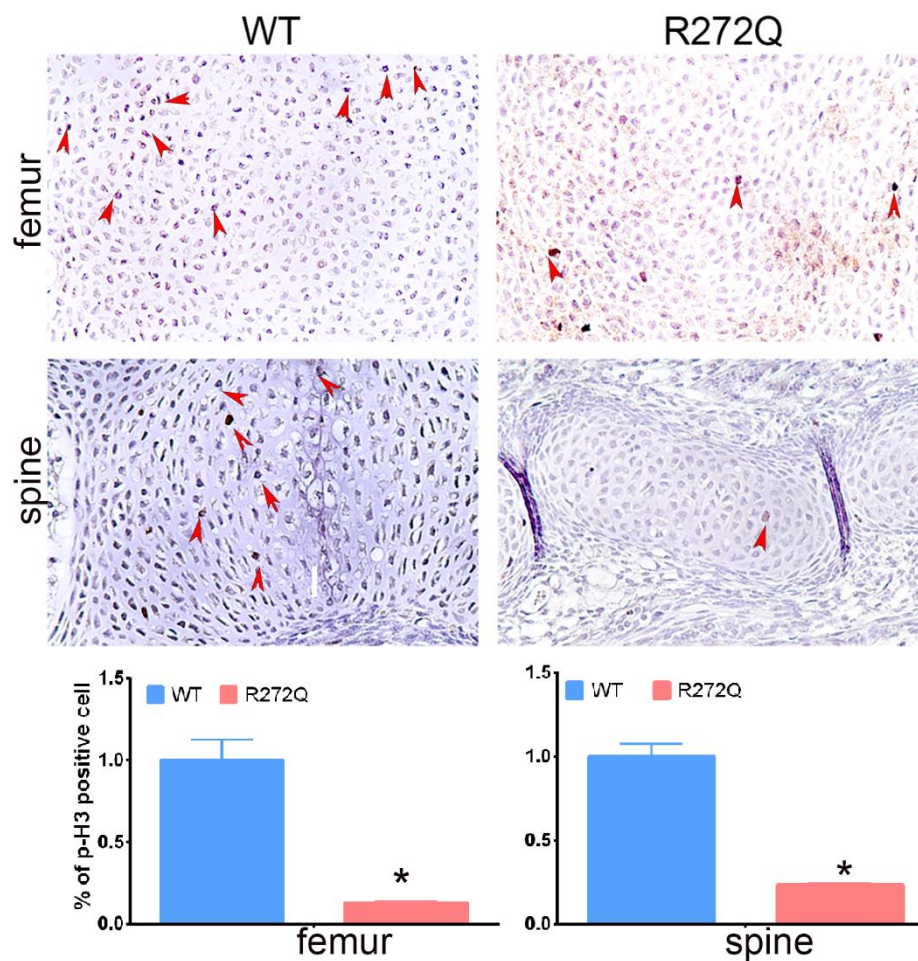

398

399 **Figure 7:** ICK dysfunction attenuates chondrocyte proliferation in spinal column and femur.  
400 Paraffin embedded sections from E15.5 of WT and *Ick* mutant embryos were immunostained  
401 with the proliferation marker p-Histone H3. Bar graphs show the quantitative data of positive  
402 cells (n=3). Scale bar=50  $\mu$ m.

403
